# Supplementary material for: A simple method to improve the performance of perovskite light-emitting diodes via layer-by-layer spin-coating CsPbBr3 quantum dots
Source: Royal Society of Chemistry journal article supplement (doi:10.1039/c8ra05104f), 2018-01-01
Supplement: c8ra05104f1.pdf [file c8ra05104f1.pdf]

## Supplementary Information

### A simple method to improve the performance of perovskite light-emitting diodes via layer-by-layer spin-coating CsPbBr<sub>3</sub> quantum dots

Bobo Li, ‡<sup>a</sup> Xiaomeng Li, ‡<sup>a</sup> Xia Li,<sup>b</sup> Haolin Liu,<sup>a</sup> Zhaonan Li,<sup>a</sup> Guohong Xiang,<sup>a</sup> Yuhan Liu,<sup>a</sup> Taojie Zhou,<sup>a</sup> Xuan Fang<sup>a</sup> and Zhaoyu Zhang\*<sup>a</sup>

a. School of Science and Engineering, The Chinese University of Hong Kong, Shenzhen, Guangdong, 518172, P. R. China.

b. State Key Laboratory of Inorganic Synthesis and Preparative Chemistry, College of Chemistry, Jilin University, Changchun, 130012, P. R. China.

‡ These authors contributed equally to this work.

\*Corresponding author: [zhangzy@cuhk.edu.cn](mailto:zhangzy@cuhk.edu.cn)

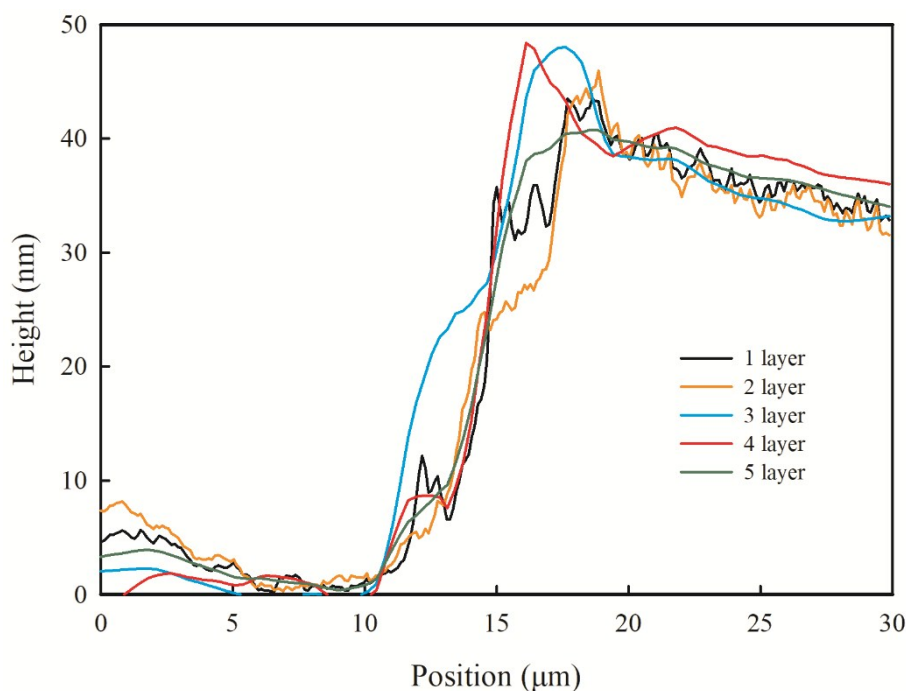

**Fig. S1** Thickness of perovskite QDs films with different layers (1~5 layers) obtained from AFM measurements.

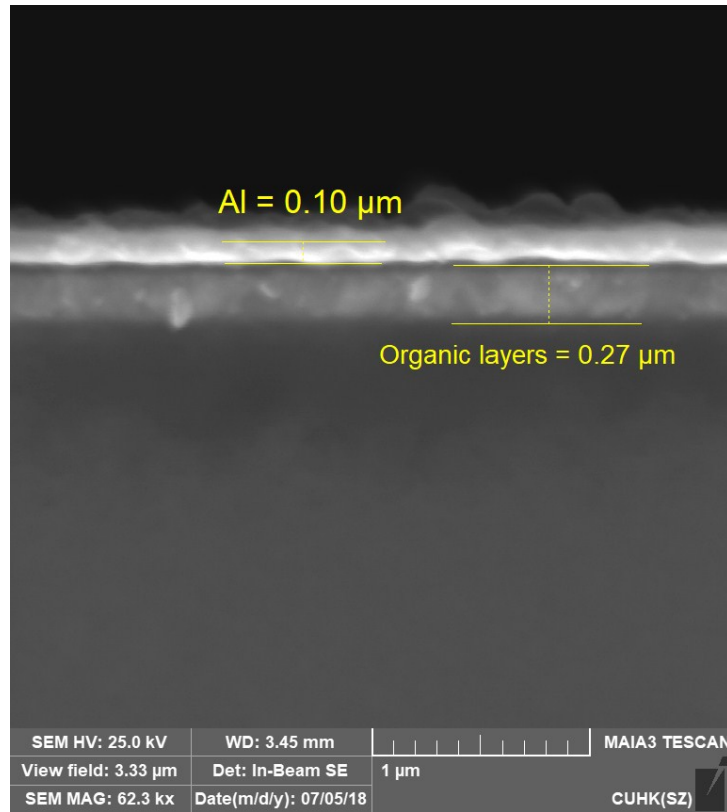

**Fig. S2** SEM cross-sectional-view of perovskite device based on 4 layers of CsPbBr<sub>3</sub> QDs. Organic layers include the multilayers of ITO, PEDOT:PSS, multilayers of perovskite QDs, TPBI and LiF.

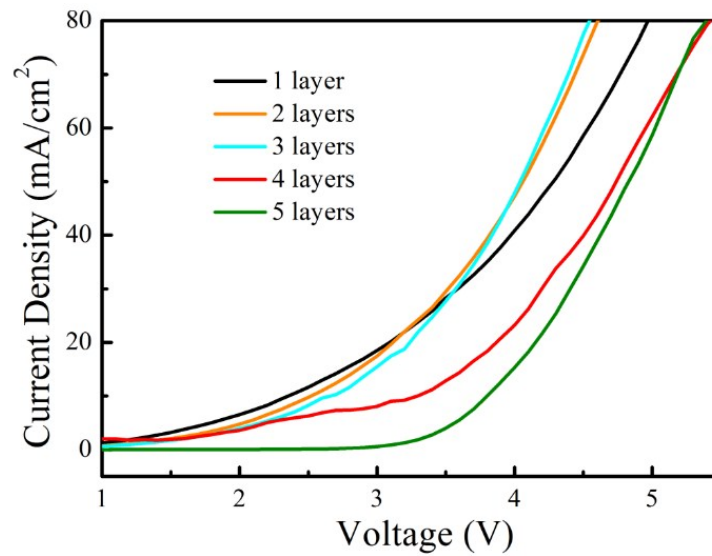

**Fig. S3** J-V curves of the devices with different layers of CsPbBr<sub>3</sub> QDs.

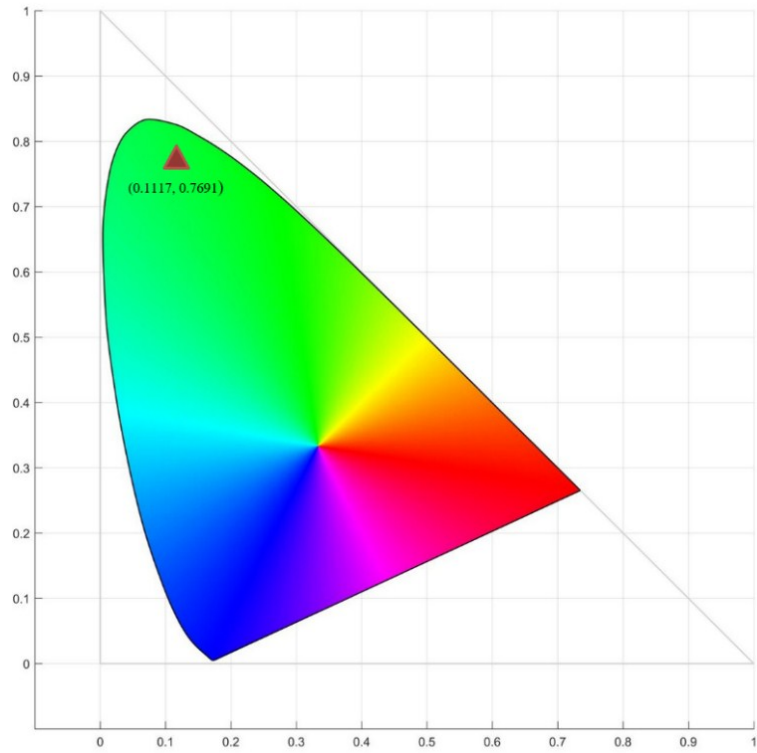

**Fig. S4** CIE color coordinates (red triangle) of the green emission spectrum.
